# Supplementary material for: Biocatalytic sulfation of aromatic and aliphatic alcohols catalyzed by arylsulfate sulfotransferases
Source: PubMed Central journal article supplement (PMC11576661; doi:10.1007/s00253-024-13354-5), 2024-11-19
Supplement: 253_2024_13354_MOESM1_ESM.pdf [file 253_2024_13354_MOESM1_ESM.pdf]

# Supporting Information

## Biocatalytic sulfation of aromatic and aliphatic alcohols catalyzed by arylsulfate sulfotransferases

Isabel Oroz-Guinea,<sup>1,2,3</sup>  Marko Rath,<sup>1,2</sup> Isabelle Tischler,<sup>2</sup> Klaus Ditrich,<sup>4</sup> Michael Breuer,<sup>4</sup> Doreen Schachtschabel,<sup>4</sup> Wolfgang Kroutil<sup>1,2,3,5</sup>

<sup>1</sup> Austrian Centre of Industrial Biotechnology c/o University of Graz Heinrichstrasse 28, 8010 Graz (Austria).

<sup>2</sup> Institute of Chemistry University of Graz, NAWI Graz, Heinrichstrasse 28, 8010 Graz (Austria).

<sup>3</sup> Field of Excellence BioHealth University of Graz Heinrichstrasse 28, 8010 Graz (Austria).

<sup>4</sup> BASF SE White Biotechnology Research, Carl-Bosch-Strasse 38, 67056 Ludwigshafen (Germany).

<sup>5</sup> BioTechMed Graz Heinrichstrasse 28, 8010 Graz (Austria).

Corresponding author: Wolfgang Kroutil, wolfgang.kroutil@uni-graz.at

**Table S1** Summary of the sequences retrieved using BLASTp with ASSTA as protein template

| ASST / Source $\mu$ organism                            | Sequence identity | Amino acids | NCBI           |
|---------------------------------------------------------|-------------------|-------------|----------------|
| ASST <i>Desulfitobacterium dehalogenans</i> ATCC 51507* | 93.2              | 629         | AFM01510.1     |
| ASST <i>Desulfitobacterium dichloroeliminans</i>        | 87.6              | 628         | WP_015263010.1 |
| ASST <i>Dehalobacterium formicoaceticum</i> *           | 86.8              | 628         | WP_089608557.1 |
| ASST <i>Desulfosporosinus lacus</i>                     | 85.0              | 627         | WP_073033341   |
| ASST <i>Desulfosporosinus</i> sp. HMP52                 | 83.7              | 628         | WP_034601251.1 |
| ASST <i>Desulfosporosinus meridiei</i>                  | 84.6              | 628         | WP_014902777.1 |
| ASST <i>Desulfosporosinus hippei</i>                    | 83.1              | 628         | WP_092334873.1 |
| ASST <i>Desulfosporosinus acididurans</i>               | 77.3              | 628         | WP_047811757.1 |
| ASST <i>Desulfosporosinus</i> sp. FKA                   | 76.5              | 629         | WP_088186734.1 |
| ASST <i>Desulfitobacterium dehalogenans</i>             | 76.1              | 629         | WP_014793958.1 |
| ASST <i>Desulfitobacterium dichloroeliminans</i>        | 75.6              | 629         | WP_015260940.1 |
| ASST <i>Desulfitobacterium hafniense</i> *              | 71.2              | 626         | KTE91359.1     |
| ASST <i>Desulfitobacterium chlororespirans</i>          | 71                | 626         | WP_072774114.1 |
| ASST <i>Clostridiales bacterium</i>                     | 70                | 636         | PWM49771.1     |
| ASST <i>Bittarella massiliensis</i>                     | 64.9              | 625         | WP_059003491.1 |
| <i>Clostridium</i> hypothetical protein                 | 64.7              | 625         | WP_021658034.1 |
| ASST <i>Desulfohalotomaculum alkaliphilum</i>           | 60.4              | 622         | WP_114638903.1 |
| ASST <i>Lachnoclostridium</i> sp. An14                  | 57.2              | 628         | WP_087224291.1 |
| ASST <i>Niameybacter massiliensis</i>                   | 58.7              | 619         | WP_053984844.1 |
| ASST <i>Desulfohalotomaculum alkaliphilum</i>           | 58.4              | 618         | WP_031517900.1 |
| ASST <i>Desulfosporosinus orientis</i> *                | 58.8              | 621         | WP_014184280.1 |
| ASST <i>Desulfotomaculum ferrireducens</i>              | 58.1              | 618         | WP_077713083.1 |
| ASST <i>Hungatella hathewayi</i>                        | 59                | 624         | WP_055659810.1 |
| ASST <i>Desulfosporosinus orientis</i> *                | 58.3              | 621         | WP_014187168.1 |
| ASST <i>Niameybacter massiliensis</i>                   | 56.6              | 626         | WP_053984585.1 |
| ASST <i>Desulfitobacterium dichloroeliminans</i>        | 58.9              | 623         | WP_015263770.1 |
| ASST <i>Desulfotomaculum ferrireducens</i>              | 57                | 621         | WP_077715208.1 |
| ASST <i>Hungatella effluvia</i> *                       | 58.5              | 624         | WP_110321498.1 |
| ASST <i>Niameybacter massiliensis</i>                   | 55.2              | 622         | WP_053983873.1 |

\* Selected DNA sequences on this work

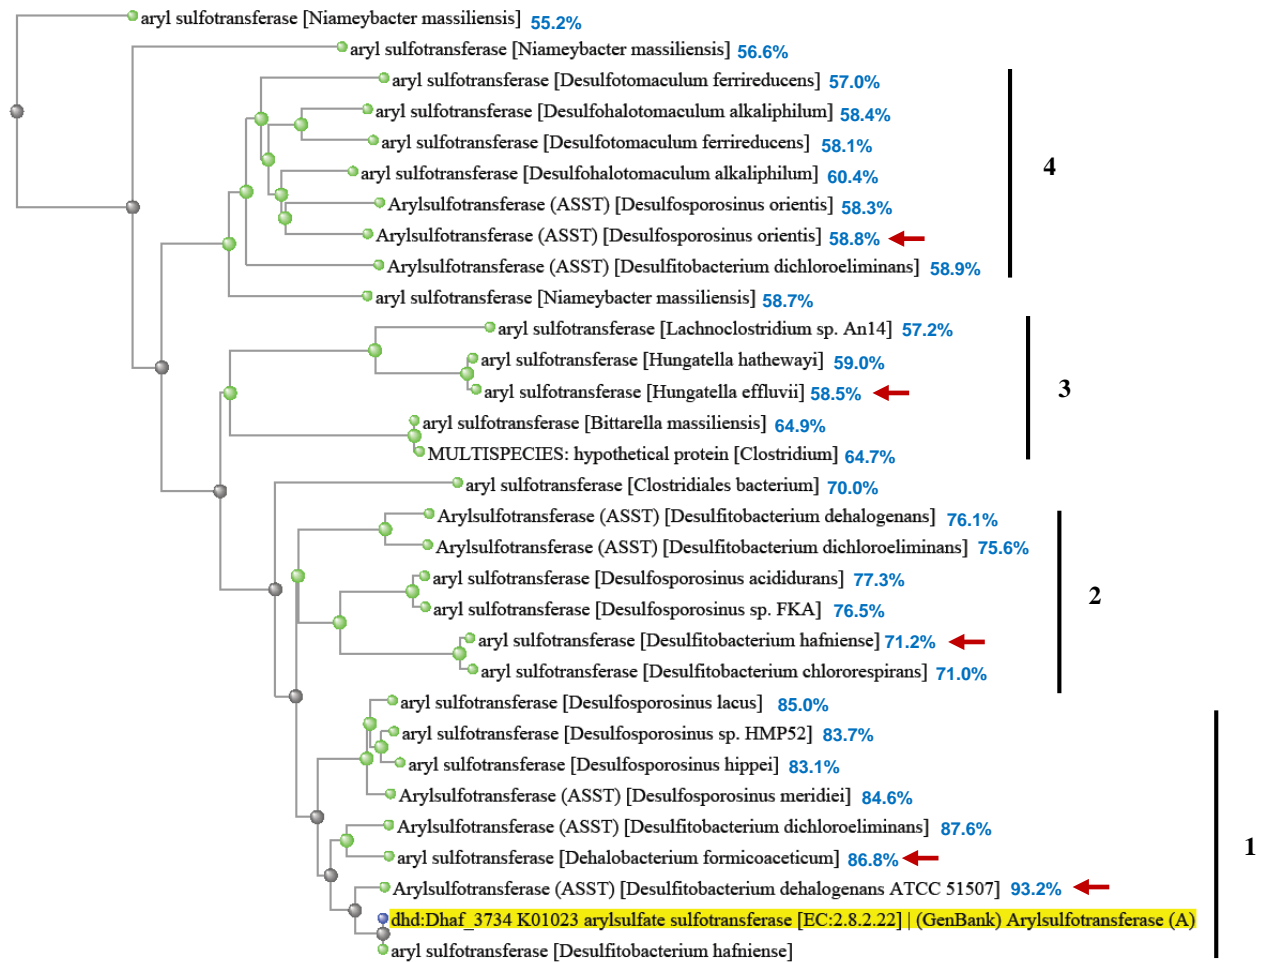

**Fig. S1** Homology tree showing the sequence similarity displayed by the proteins retrieved from the BLAST search using ASSTA from *D. hafniense* as protein template. The four main branches that constitute the tree are numbered to facilitate their differentiation. The model protein is highlighted in yellow and the homologous proteins chosen are marked with red arrows. Homology percentages with ASSTA are written in blue next to all the protein names

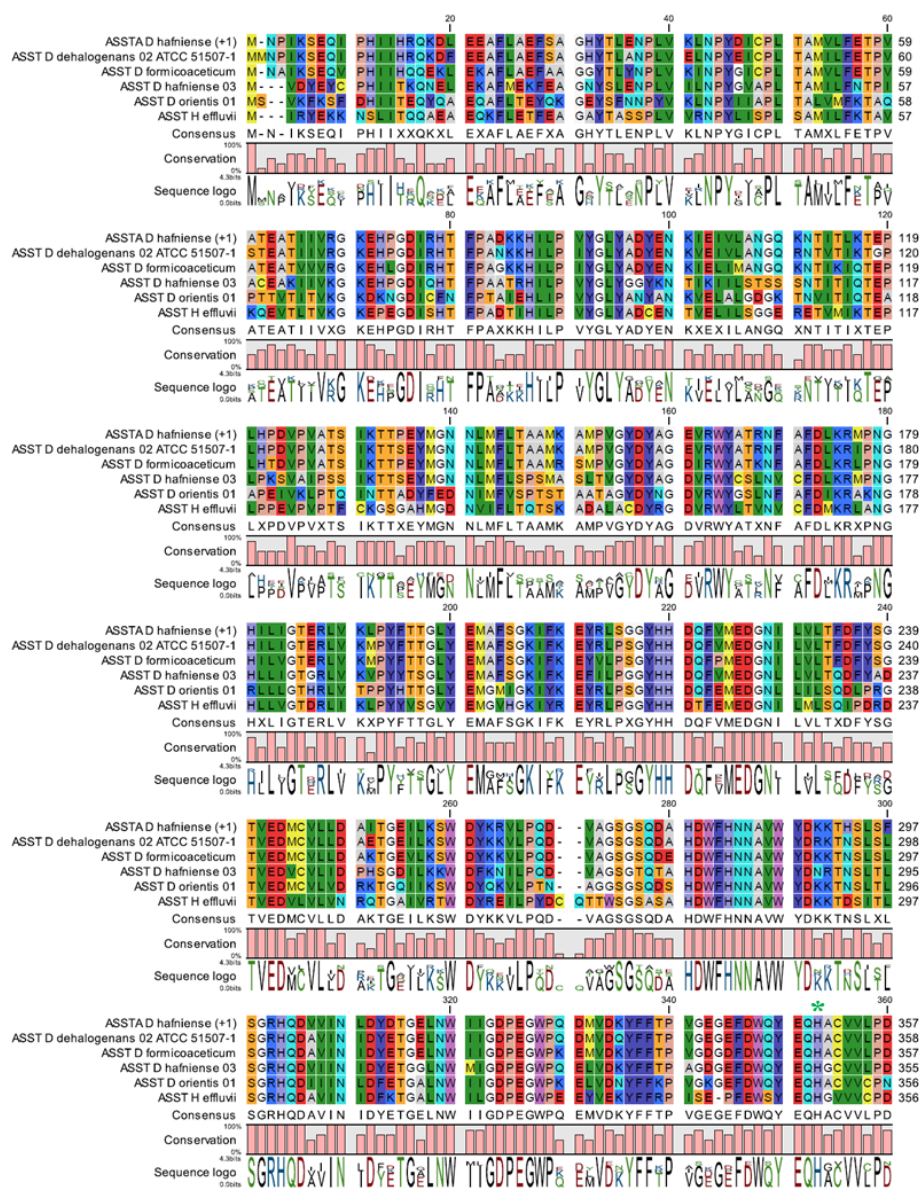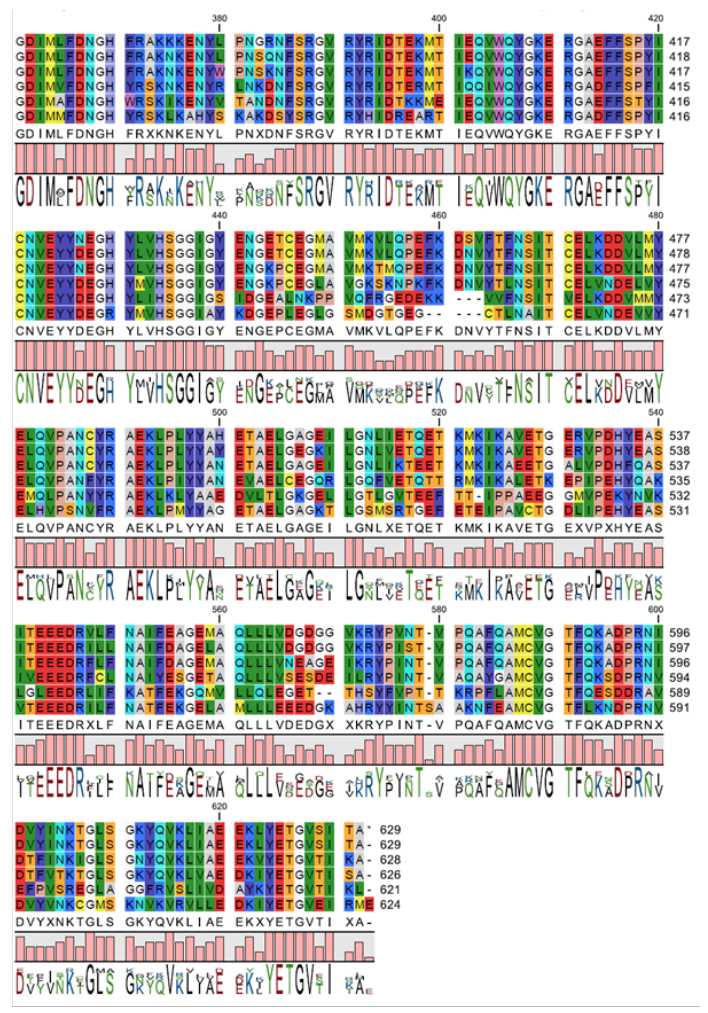

Fig. S2 Alignment of the protein sequences chosen from the ASSTA BLAST analysis. The expected catalytic His of ASSTA in marked with a green asterisk (\*)

**Table S2** Summary of the strains and culture conditions utilized for the overexpression of the ASSTs

| <b>Enzyme</b>                                   | <b>ASSTA</b>                | <b>ASSTB</b>                | <b>ASST<math>Heff</math></b> | <b>ASSTDor</b>              | <b>ASSTDfor</b>             | <b>ASSTC</b>                | <b>ASSTDdeh</b>             |
|-------------------------------------------------|-----------------------------|-----------------------------|------------------------------|-----------------------------|-----------------------------|-----------------------------|-----------------------------|
| <b>pEG<sup>a</sup></b>                          | pEG548                      | pEG549                      | pEG559                       | pEG558                      | pEG556                      | pEG557                      | pEG555                      |
| <b>Vector</b>                                   | pET26b(+)                   | pET28a(+)                   | pET28a(+)                    | pET28a(+)                   | pET28a(+)                   | pET28a(+)                   | pET28a(+)                   |
| <b>Restriction sites</b>                        | <i>SacI</i> and <i>SalI</i> | <i>NcoI</i> and <i>SalI</i> | <i>NcoI</i> and <i>SalI</i>  | <i>NcoI</i> and <i>SalI</i> | <i>NcoI</i> and <i>SalI</i> | <i>NcoI</i> and <i>SalI</i> | <i>NcoI</i> and <i>SalI</i> |
| <b>Tag</b>                                      | C-term His-tag              | C-term His-tag              | C-term His-tag               | C-term His-tag              | C-term His-tag              | C-term His-tag              | C-term His-tag              |
| <b>Expression strain</b>                        | BL21(DE3)                   | BL21(DE3)                   | BL21(DE3)                    | BL21(DE3)                   | BL21(DE3)                   | BL21(DE3)                   | BL21(DE3)                   |
| <b>Media</b>                                    | LB                          | LB                          | LB                           | LB                          | LB                          | LB                          | LB                          |
| <b>[Antibiotic]<sub>cut</sub></b>               | Kan (50 µg/ml)              | Kan (50 µg/ml)              | Kan (50 µg/ml)               | Kan (50 µg/ml)              | Kan (50 µg/ml)              | Kan (50 µg/ml)              | Kan (50 µg/ml)              |
| <b>O/Nc volume, temperature and shaking</b>     | 10 ml, 37 °C, 120 rpm       | 10 ml, 37 °C, 120 rpm       | 10 ml, 37 °C, 120 rpm        | 10 ml, 37 °C, 120 rpm       | 10 ml, 37 °C, 120 rpm       | 10 ml, 37 °C, 120 rpm       | 10 ml, 37 °C, 120 rpm       |
| <b>Usual culture volume</b>                     | 500 ml                      | 500 ml                      | 500 ml                       | 500 ml                      | 500 ml                      | 500 ml                      | 500 ml                      |
| <b>Inoculation volume</b>                       | 1 % (5 ml)                  | 1 % (5 ml)                  | 1 % (5 ml)                   | 1 % (5 ml)                  | 1 % (5 ml)                  | 1 % (5 ml)                  | 1 % (5 ml)                  |
| <b>Culture temperature and shaking</b>          | 37 °C, 140 rpm              | 37 °C, 140 rpm              | 37 °C, 140 rpm               | 37 °C, 140 rpm              | 37 °C, 140 rpm              | 37 °C, 140 rpm              | 37 °C, 140 rpm              |
| <b>Induction OD<sub>600</sub></b>               | ~0.6                        | ~0.6                        | ~0.6                         | ~0.6                        | ~0.6                        | ~0.6                        | ~0.6                        |
| <b>Inducer</b>                                  | IPTG (1 mM)                 | IPTG (0.4 mM)               | IPTG (1 mM)                  | IPTG (1 mM)                 | IPTG (1 mM)                 | IPTG (1 mM)                 | IPTG (1 mM)                 |
| <b>Induction time, temperature and shaking.</b> | O/N, 20 °C, 120 rpm         | O/N, 30 °C, 140 rpm         | O/N, 20 °C, 120 rpm          | O/N, 20 °C, 120 rpm         | O/N, 20 °C, 120 rpm         | O/N, 20 °C, 120 rpm         | O/N, 20 °C, 120 rpm         |
| <b>Purification</b>                             | Ni <sup>2+</sup> -NTA       | Ni <sup>2+</sup> -NTA       | Ni <sup>2+</sup> -NTA        | Ni <sup>2+</sup> -NTA       | Ni <sup>2+</sup> -NTA       | Ni <sup>2+</sup> -NTA       | Ni <sup>2+</sup> -NTA       |

<sup>a</sup> pEG refers to the internal plasmid numbering; pEG stand for plasmid of the Elk Group.

**Table S3** Expected molecular weights and theoretical molar extinction coefficients for the different overexpressed ASSTs

| ASST             | Molecular weight (kDa) | Theoretical molar extinction coefficient [ $M^{-1} cm^{-1}$ ] |
|------------------|------------------------|---------------------------------------------------------------|
| ASSTA            | 76.0                   | 93360                                                         |
| ASSTB            | 74.0                   | 110310                                                        |
| ASST <i>Heff</i> | 70.7                   | 99290                                                         |
| ASST <i>Dor</i>  | 70.5                   | 97650                                                         |
| ASST <i>Dfor</i> | 71.4                   | 97770                                                         |
| ASSTC            | 71.0                   | 96160                                                         |
| ASST <i>Ddeh</i> | 71.6                   | 94640                                                         |

**Table S4** Determined *p*NP molar extinction coefficient under the different reaction conditions employed

| Buffer                    | pH   | Wavelength (nm) | Co-solvent (10%, v/v)     | Molar extinction coefficient ( $\epsilon$ ) $mM^{-1} cm^{-1}$ |
|---------------------------|------|-----------------|---------------------------|---------------------------------------------------------------|
| Bis Tris                  | 5.5  | 350 nm          | —                         | 5.0                                                           |
|                           | 6.0  |                 | —                         | 5.0                                                           |
|                           | 7.0  |                 | —                         | 8.4                                                           |
| Na <sup>+</sup> phosphate | 7.0  | 410 nm          | —                         | 11.1                                                          |
|                           | 8.0  |                 | —                         | 15.7                                                          |
| Tris / HCl                | 8.0  | 410 nm          | —                         | 15.6                                                          |
|                           | 9.0  |                 | —                         | 16.7                                                          |
| Na <sup>+</sup> carbonate | 9.0  | 410 nm          | —                         | 16.9                                                          |
|                           | 10.0 |                 | —                         | 16.9                                                          |
|                           | 10.5 |                 | —                         | 16.8                                                          |
| AMP                       | 9.0  | 410 nm          | —                         | 17.4                                                          |
|                           | 10   |                 | —                         | 17.4                                                          |
|                           | 10.5 |                 | —                         | 17.7                                                          |
| Tris / HCl                | 8.0  | 410             | DMSO                      | 18.7                                                          |
|                           |      |                 | Acetone                   | 18.3                                                          |
|                           |      |                 | Methanol                  | 17.8                                                          |
|                           |      |                 | 2-Propanol                | 19.0                                                          |
|                           |      |                 | DMF                       | 19.2                                                          |
|                           |      |                 | 1,2-(MeO) <sub>2</sub> Et | 18.8                                                          |

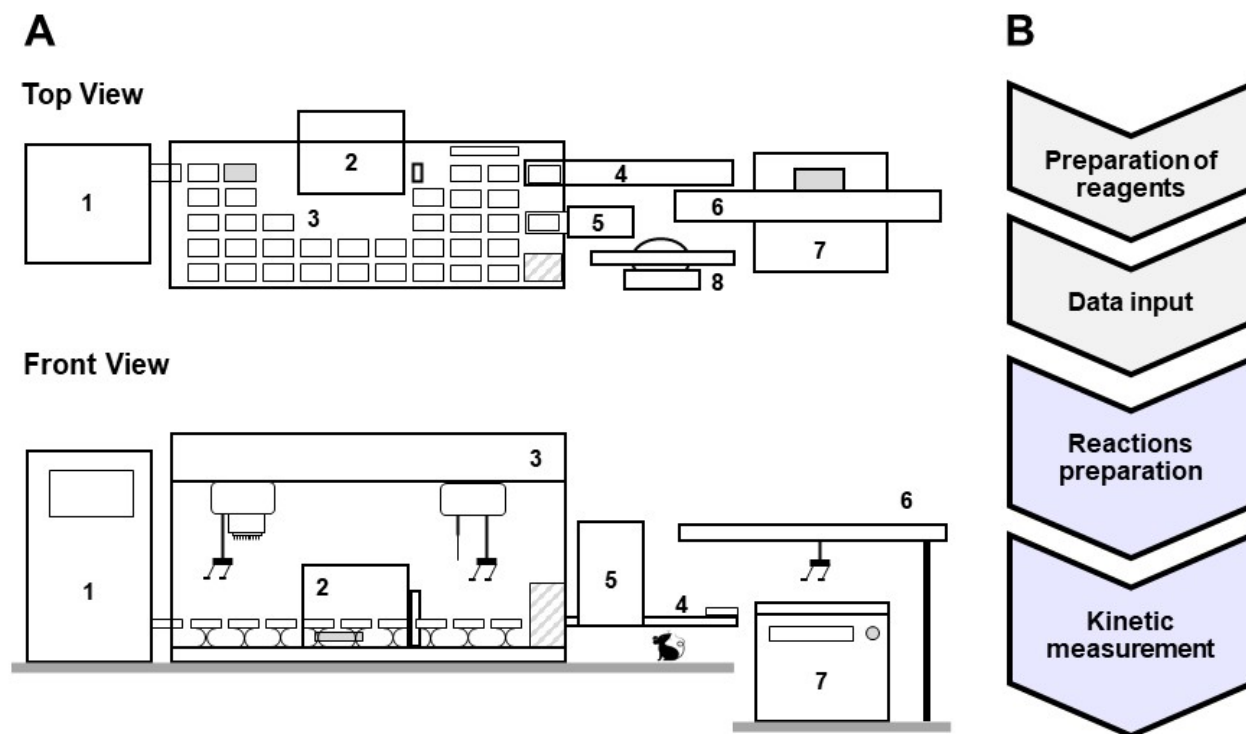

**Fig. S3** (A) Schematic representation of the high throughput robotic platform (Xavier), including (1) an SBS-format plates incubator (Cytomat 2C450), (2) an UV/vis and fluorescence microtiter plate (MTP) reader (FLUOstar Omega, BMG), (3) a liquid handling robot (Biomek i7 Hybrid, Beckman Coulter), (4) MTP shuttle (Servo Shuttle, Beckman Coulter), (5) colony detection module (Visual ALP, Amplius), (6) BRT II and (7) refrigerated centrifuge (Rotanta 460, Hettich). These different devices are controlled and integrated through (8) Biomek and DART 2.0 software (representation of the PC on the front view was avoided for clarity). (B) Workflow for measuring the ASSTs Michaelis-Menten kinetics (grey background: steps performed manually; blue background: automated steps performed by the robotic platform)

**Table S5** FIA-MS method applied for the detection of mono-, di- and trisulfated compounds synthesized by ASSTs

|                                |                                         |
|--------------------------------|-----------------------------------------|
| <b>Column:</b>                 | no column, SecurityGuard™ C18 cartridge |
| <b>Column temperature:</b>     | not controlled                          |
| <b>Eluent composition:</b>     | H <sub>2</sub> O/MeOH 50:50, isocratic  |
| <b>Eluent flow rate:</b>       | 0.5 mL/min                              |
| <b>Run time:</b>               | 1.4 min                                 |
| <b>Injection volume:</b>       | 5 µl                                    |
| <b>Ionization mode:</b>        | API-ES, negative polarity               |
| <b>Drying gas temperature:</b> | 300 °C                                  |
| <b>Drying gas flow:</b>        | 6.0 L/min                               |
| <b>Nebulizer pressure:</b>     | 15 psig (2.0 bar)                       |
| <b>Capillary voltage:</b>      | 3000 V                                  |
|                                | 100% cycle time                         |
| <b>Signal 1 (scan):</b>        | Mass range 30-500                       |
|                                | Fragmentor 70 V                         |

*Note:* All samples were analyzed in scan mode and the chromatograms of the target masses were extracted in post-processing



**Table S6** Target masses and internal standards used for the detection of the sulfated compounds synthesized in the biotransformations with substrates 2-7

| <b>Analyte</b>                      | <b>Mass (<i>m/z</i>)</b>                                            |
|-------------------------------------|---------------------------------------------------------------------|
| PIPES                               | 301 [ <i>M-H</i> ] <sup>-</sup>                                     |
| <i>p</i> NPS                        | 218 [ <i>M-H</i> ] <sup>-</sup>                                     |
| <i>p</i> NP                         | 138 [ <i>M-H</i> ] <sup>-</sup>                                     |
| Cathechol ( <b>2</b> )              | 109 [ <i>M-H</i> ] <sup>-</sup>                                     |
| Monosulfated <b>2</b>               | 189 [ <i>M-H</i> ] <sup>-</sup>                                     |
| Disulfated <b>2</b>                 | 269 [ <i>M-H</i> ] <sup>-</sup> ; 134 [ <i>M-2H</i> ] <sup>2-</sup> |
| Resorcinol ( <b>3</b> )             | 109 [ <i>M-H</i> ] <sup>-</sup>                                     |
| Monosulfated <b>3</b>               | 189 [ <i>M-H</i> ] <sup>-</sup>                                     |
| Disulfated <b>3</b>                 | 269 [ <i>M-H</i> ] <sup>-</sup> ; 134 [ <i>M-2H</i> ] <sup>2-</sup> |
| Hydroquinone ( <b>4</b> )           | 109 [ <i>M-H</i> ] <sup>-</sup>                                     |
| Monosulfated <b>4</b>               | 189 [ <i>M-H</i> ] <sup>-</sup>                                     |
| Disulfated <b>4</b>                 | 269 [ <i>M-H</i> ] <sup>-</sup> ; 134 [ <i>M-2H</i> ] <sup>2-</sup> |
| 1,2,4-benzenetriol ( <b>5</b> ),    | 125 [ <i>M-H</i> ] <sup>-</sup>                                     |
| Monosulfated <b>5</b>               | 205 [ <i>M-H</i> ] <sup>-</sup>                                     |
| Disulfated <b>5</b>                 | 285 [ <i>M-H</i> ] <sup>-</sup> ; 142 [ <i>M-2H</i> ] <sup>2-</sup> |
| Trisulfated <b>5</b>                | 365 [ <i>M-H</i> ] <sup>-</sup>                                     |
| 1,3,5-benzenetriol ( <b>6</b> )     | 125 [ <i>M-H</i> ] <sup>-</sup>                                     |
| Monosulfated <b>6</b>               | 205 [ <i>M-H</i> ] <sup>-</sup>                                     |
| Disulfated <b>6</b>                 | 285 [ <i>M-H</i> ] <sup>-</sup> ; 142 [ <i>M-2H</i> ] <sup>2-</sup> |
| Trisulfated <b>6</b>                | 365 [ <i>M-H</i> ] <sup>-</sup>                                     |
| 4,4'-dihydroxybiphenyl ( <b>7</b> ) | 185 [ <i>M-H</i> ] <sup>-</sup>                                     |
| Monosulfated <b>7</b>               | 265 [ <i>M-H</i> ] <sup>-</sup>                                     |
| Disulfated <b>7</b>                 | 345 [ <i>M-H</i> ] <sup>-</sup> ; 172 [ <i>M-2H</i> ] <sup>2-</sup> |

**Table S7** HPLC-MS method applied for the detection of mono-, di- and trisulfated compounds synthesized by ASSTs

|                                |                                                          |
|--------------------------------|----------------------------------------------------------|
| <b>Column:</b>                 | Phenomenex Luna C18 column, SecurityGuard™ C18 cartridge |
| <b>Column temperature:</b>     | not controlled                                           |
| <b>Eluent composition:</b>     | H <sub>2</sub> O/MeOH 50:50, isocratic                   |
| <b>Eluent flow rate:</b>       | 1.0 mL/min                                               |
| <b>Run time:</b>               | 15 min                                                   |
| <b>Injection volume:</b>       | 5 µl                                                     |
| <b>Ionization mode:</b>        | API-ES, negative polarity                                |
| <b>Drying gas temperature:</b> | 350 °C                                                   |
| <b>Drying gas flow:</b>        | 10.0 L/min                                               |
| <b>Nebulizer pressure:</b>     | 35 psig (2.4 bar)                                        |
| <b>Capillary voltage:</b>      | 3000 V                                                   |
|                                | 100% cycle time                                          |
| <b>Signal 1 (scan):</b>        | Mass range 35-500                                        |
|                                | Fragmentor 40 V                                          |

*Note:* All samples were analysed in scan mode and the chromatograms of the target masses were extracted in post-processing

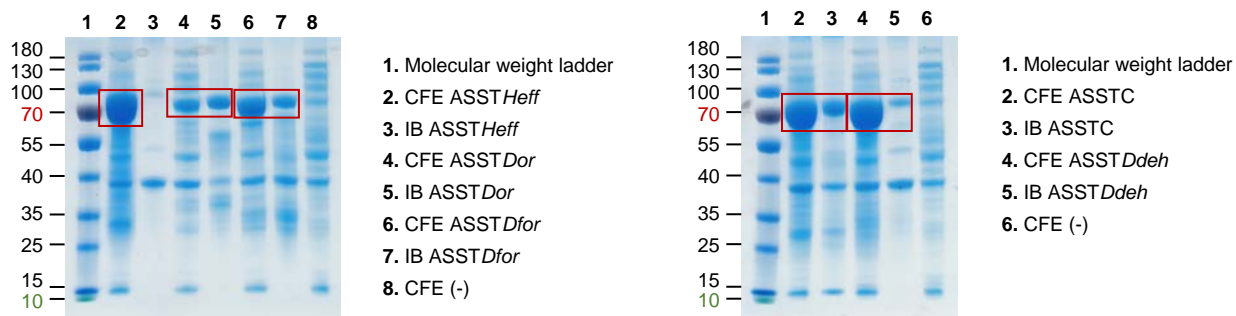

**Fig. S4** Overexpression of the ASSTs displaying sequence homology with ASSTA. **CFE:** cell free extract; **IB:** inclusion bodies; (-): negative control. The expected molecular weights are described in **Table S3**

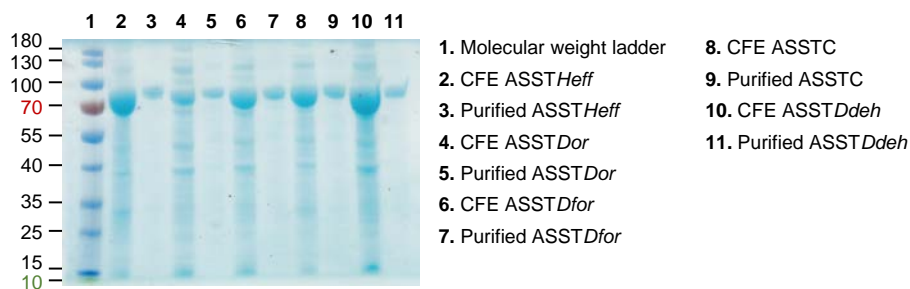

**Fig. S5** IMAC purification of the ASSTs displaying sequence homology with ASSTA. **CFE:** cell free extract; (-): negative control. The expected molecular weights are described in **Table S3**

**Table S8** Activity measured for the different ASSTs

| ASST            | Activity U/ml <sub>CFE</sub>                                                                |                                                                                               |                                                                                                |                                                                                               |
|-----------------|---------------------------------------------------------------------------------------------|-----------------------------------------------------------------------------------------------|------------------------------------------------------------------------------------------------|-----------------------------------------------------------------------------------------------|
|                 | Substrate                                                                                   |                                                                                               |                                                                                                |                                                                                               |
|                 | <br>Phenol | <br>Catechol | <br>Uridine | <br>GlcNAc |
| <i>ASSTHeff</i> | 1.7                                                                                         | 20.0                                                                                          | n.d.                                                                                           | n.d.                                                                                          |
| <i>ASSTDor</i>  | 0.1                                                                                         | 2.0                                                                                           | n.d.                                                                                           | n.d.                                                                                          |
| <i>ASSTDfor</i> | 7.4                                                                                         | 26.0                                                                                          | n.d.                                                                                           | n.d.                                                                                          |
| <i>ASSTC</i>    | 0.2                                                                                         | 1.5                                                                                           | n.d.                                                                                           | n.d.                                                                                          |
| <i>ASSTDdeh</i> | 22.3                                                                                        | 135.9                                                                                         | n.d.                                                                                           | n.d.                                                                                          |
| <i>ASSTA</i>    | 0.7                                                                                         | 3.4                                                                                           | n.d.                                                                                           | n.d.                                                                                          |
| <i>ASSTB</i>    | 11.6                                                                                        | 16.6                                                                                          | n.d.                                                                                           | n.d.                                                                                          |

**n.d.:** no activity detected

Reactions conditions: Tris/HCl buffer (50 mM, pH 8.0), *p*NPS (1 mM), acceptor substrate (1 mM) and the ASST-containing CFE. Reaction progress was followed spectrophotometrically at 410 nm

**Table S9** Melting temperature values measured by thermofluor assay. Each sample contained Sypro® Orange as fluorescent dye (2.5  $\mu$ l in 50 mM MES buffer pH 7.0) and the corresponding ASST (1 mg/ml final conc.) dissolved in buffer (Tris/HCl 50 mM at pH 8.0 or 9.0, 25  $\mu$ l final volume)

|                 | $T_m$ (°C)     |                |
|-----------------|----------------|----------------|
|                 | pH 8.0         | pH 9.0         |
| <b>ASSTA</b>    | 44.5 $\pm$ 0.7 | 40.0 $\pm$ 0.0 |
| <b>ASSTB</b>    | 43.0 $\pm$ 0.0 | 38.3 $\pm$ 0.6 |
| <b>ASSTC</b>    | 39.3 $\pm$ 0.6 | 35.7 $\pm$ 0.6 |
| <b>ASSTHeff</b> | 38.7 $\pm$ 0.6 | 35.7 $\pm$ 2.1 |
| <b>ASSTDfor</b> | 40.7 $\pm$ 0.6 | 38.0 $\pm$ 0.0 |
| <b>ASSTDor</b>  | 38.0 $\pm$ 1.0 | 38.0 $\pm$ 0.0 |
| <b>ASSTDdeh</b> | 39.0 $\pm$ 0.0 | 36.0 $\pm$ 0.0 |

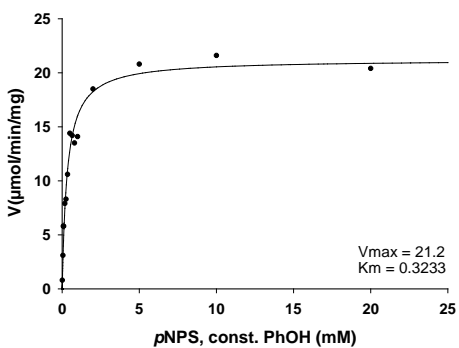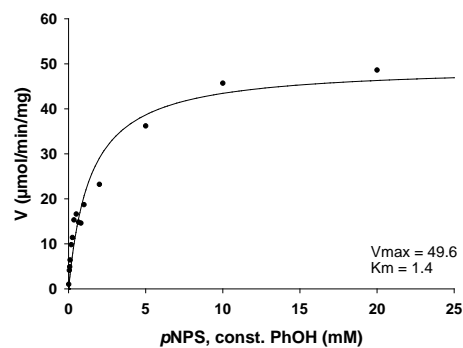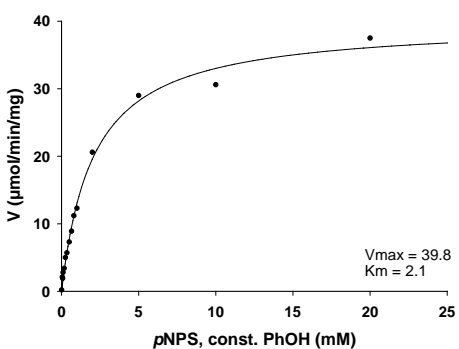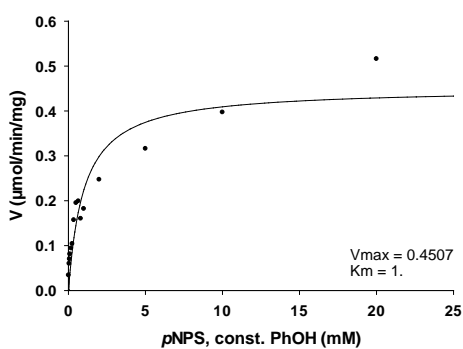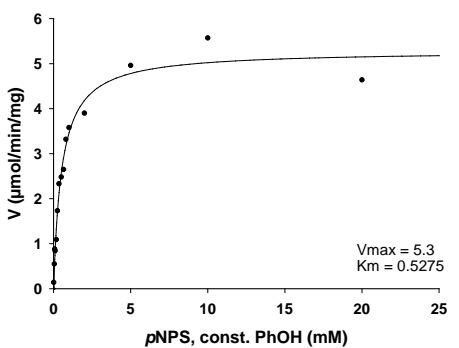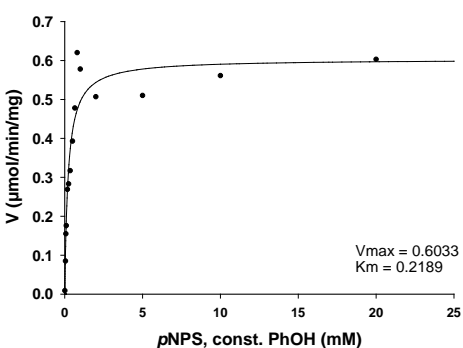

### ASSTDdeh

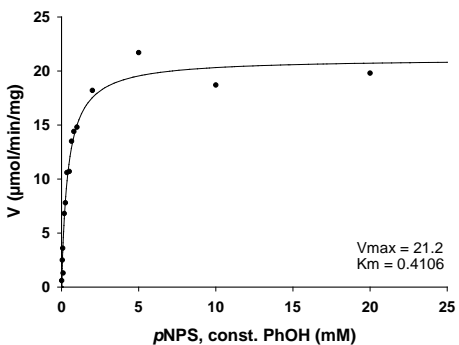

**Fig. S6** Apparent kinetic parameters of ASSTA, ASSTB, ASSTHeff, ASSTDor, ASSTDfor, ASSTC, and ASSTDdeh for  $p\text{NPS}$ . Reaction conditions: Tris/HCl buffer (50 mM, pH 8.0),  $p\text{NPS}$  (0-20 mM), phenol (**1**) (100 mM) and the purified ASST (50 nM)

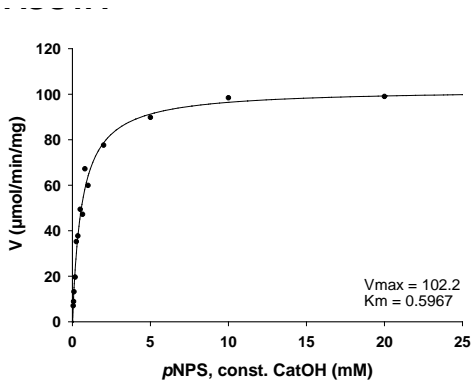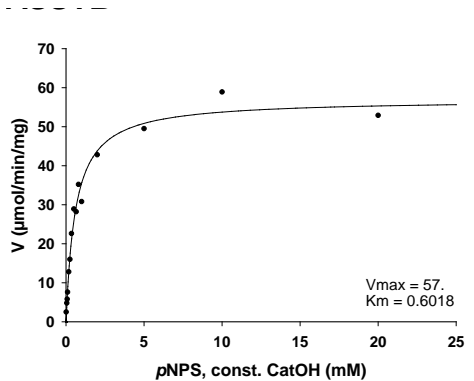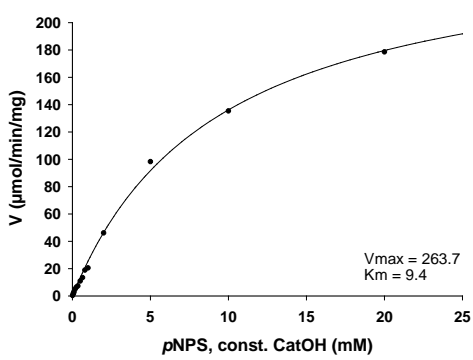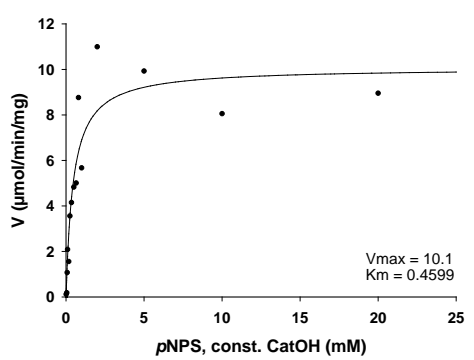

**ASSTC**

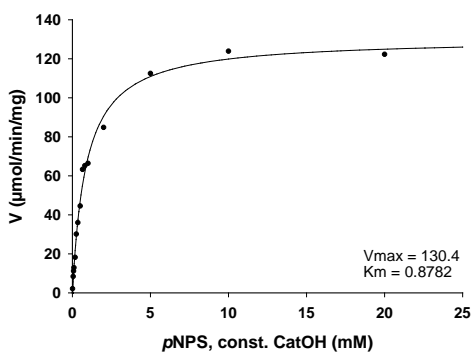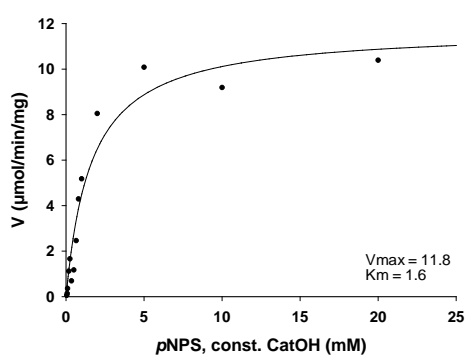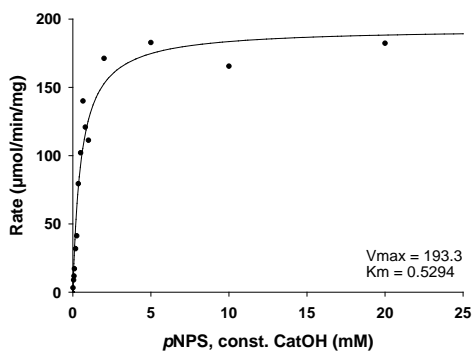

**Fig. S7.** Apparent kinetic parameters of ASSTA, ASSTB, ASSTHeff, ASSTDor, ASSTDfor, ASSTC, and ASSTDdeh for *p*NPS. Reaction conditions: Tris/HCl buffer (50 mM, pH 8.0), *p*NPS (0-20 mM), catechol (2) (100 mM) and the purified ASST (50 nM)

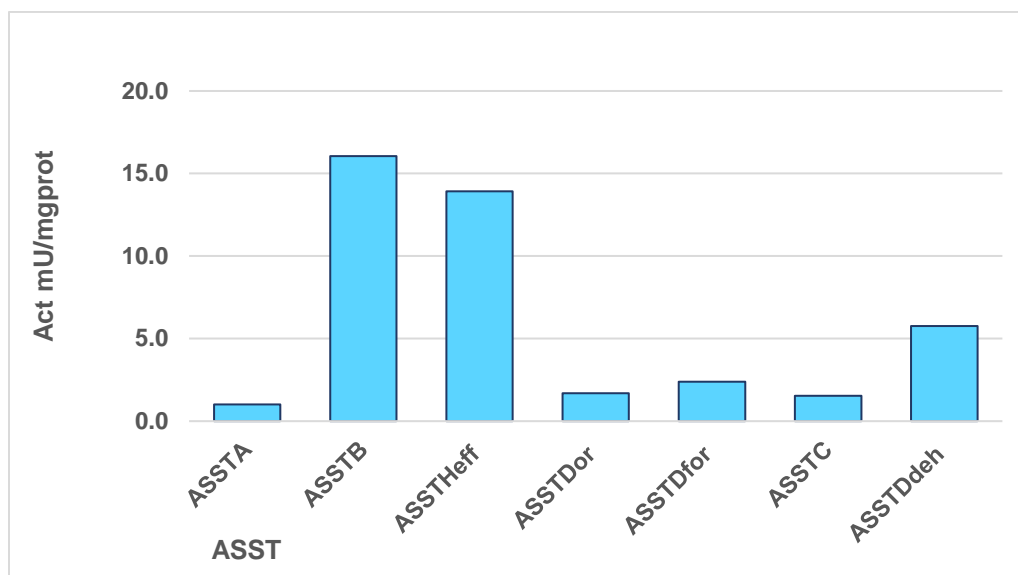

**Fig. S8** Activity displayed by each enzyme in presence of 10% 2-propanol in the absence any other acceptor substrate. Reactions conditions: Tris/HCl buffer (50 mM, pH 8.0), *p*NPS (1 mM), 2-propanol (10%, v/v) and the purified ASST

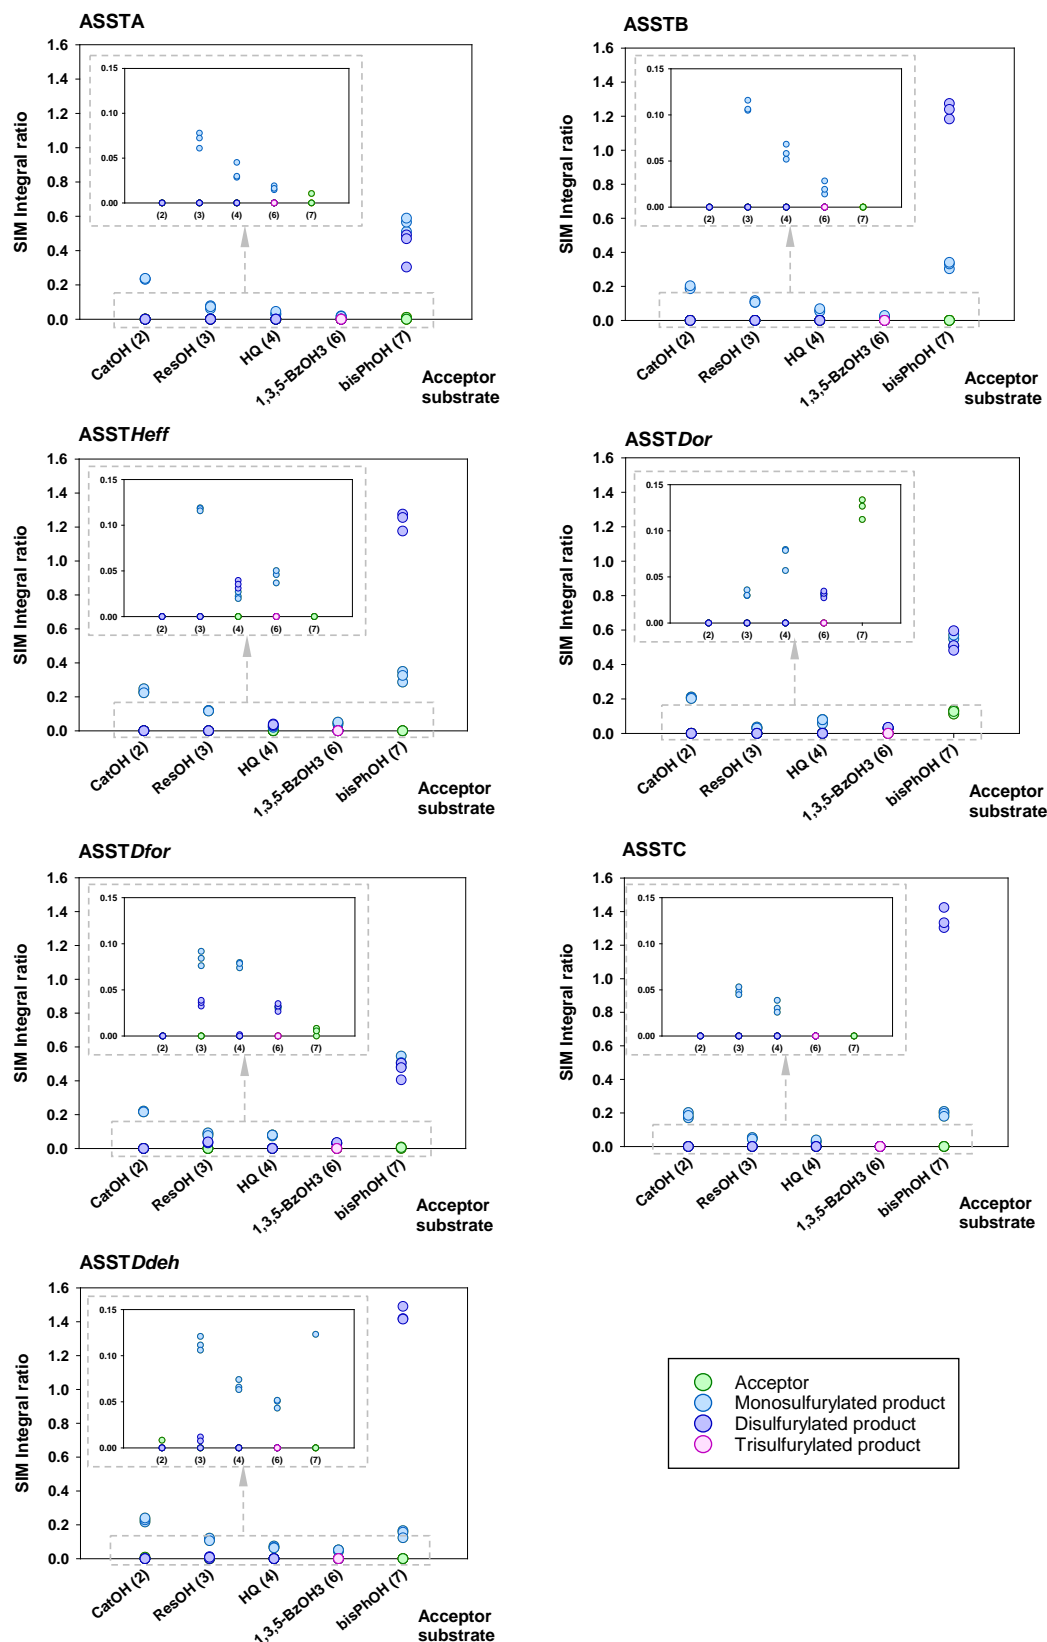

**Fig. S9** Polysulfation screening of di- and trihydroxy aromatic compounds catalyzed by ASSTs. Coloured dots show the SIM integral ratios (target/buffer) of the substrate and the possible products in the biotransformations. Reactions were carried out in buffer PIPES 20 mM, pH 8.0; acceptor (2, 3, 4, 6, or 7) 0.5 mM; *p*NPS 1.5 mM; and purified ASST.

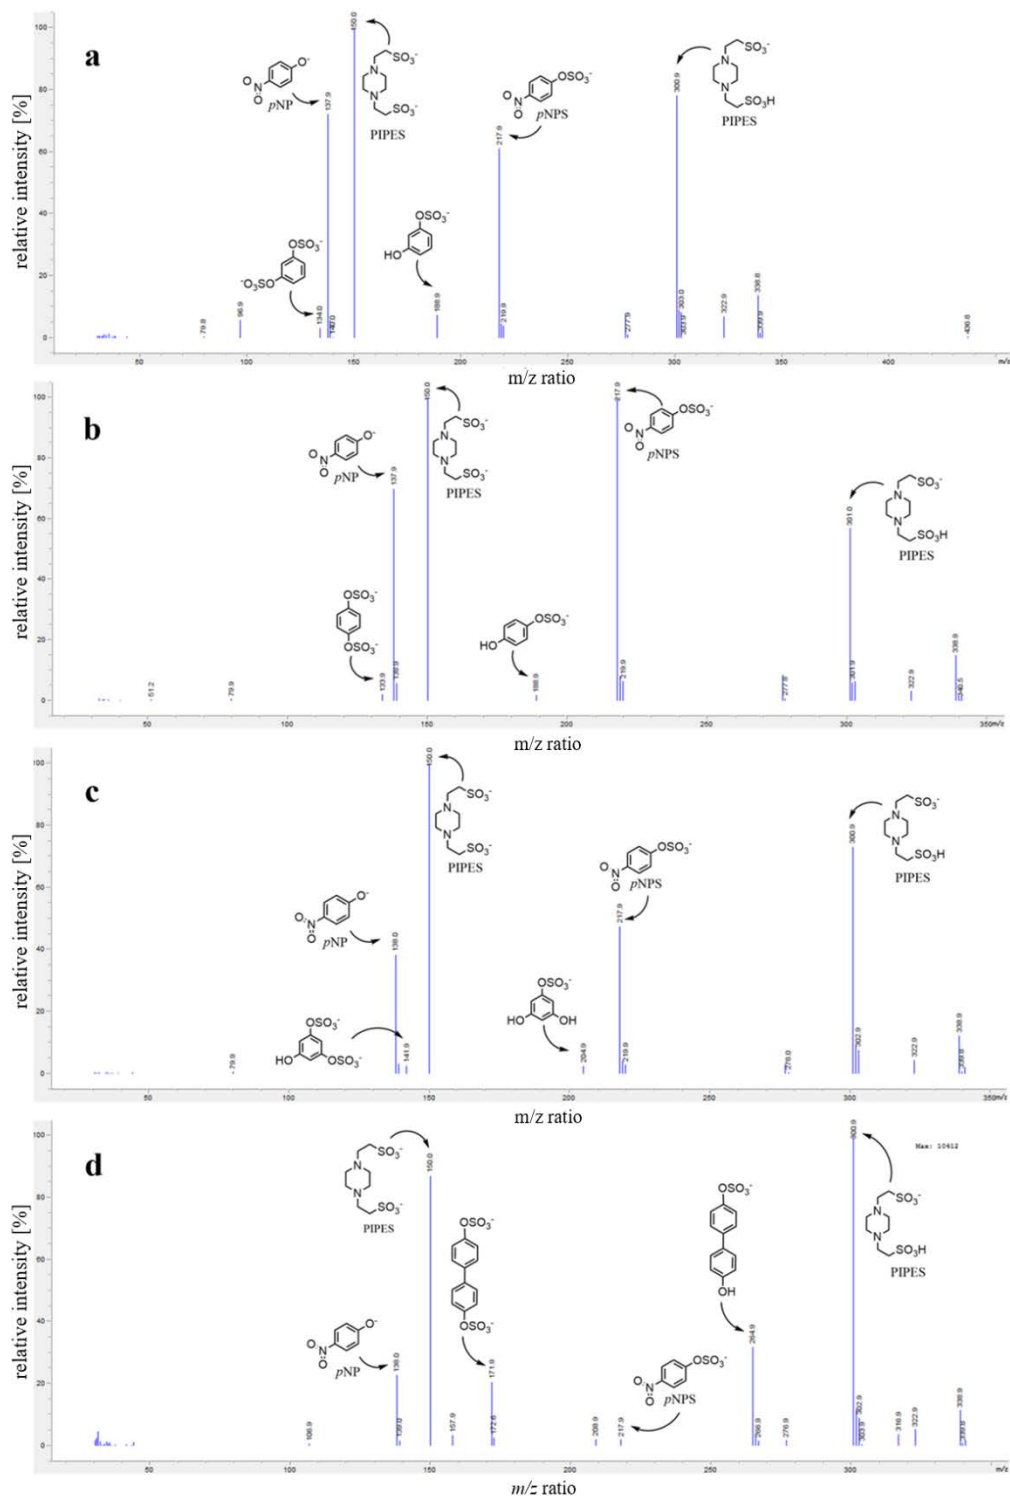

**Fig. S10** Examples of mass spectra obtained in FIA-MS analysis of disulfation reactions with ASST. **(a)** Conversion of resorcinol (**3**) to the mono- and disulfate derivative ( $m/z$ : 188.9 and 134.0 respectively). **(b)** Conversion of hydroquinone (**4**) to the mono- and disulfate ( $m/z$ : 188.9 and 134.0 respectively). **(c)** Conversion of 1,3,5-benzenetriol (**6**) to the mono- and disulfate ( $m/z$ : 204.9 and 141.9 respectively). **(d)** Conversion of 4,4'-dihydroxybiphenyl (**7**) to the mono- and disulfate ( $m/z$ : 264.9 and 171.9 respectively).



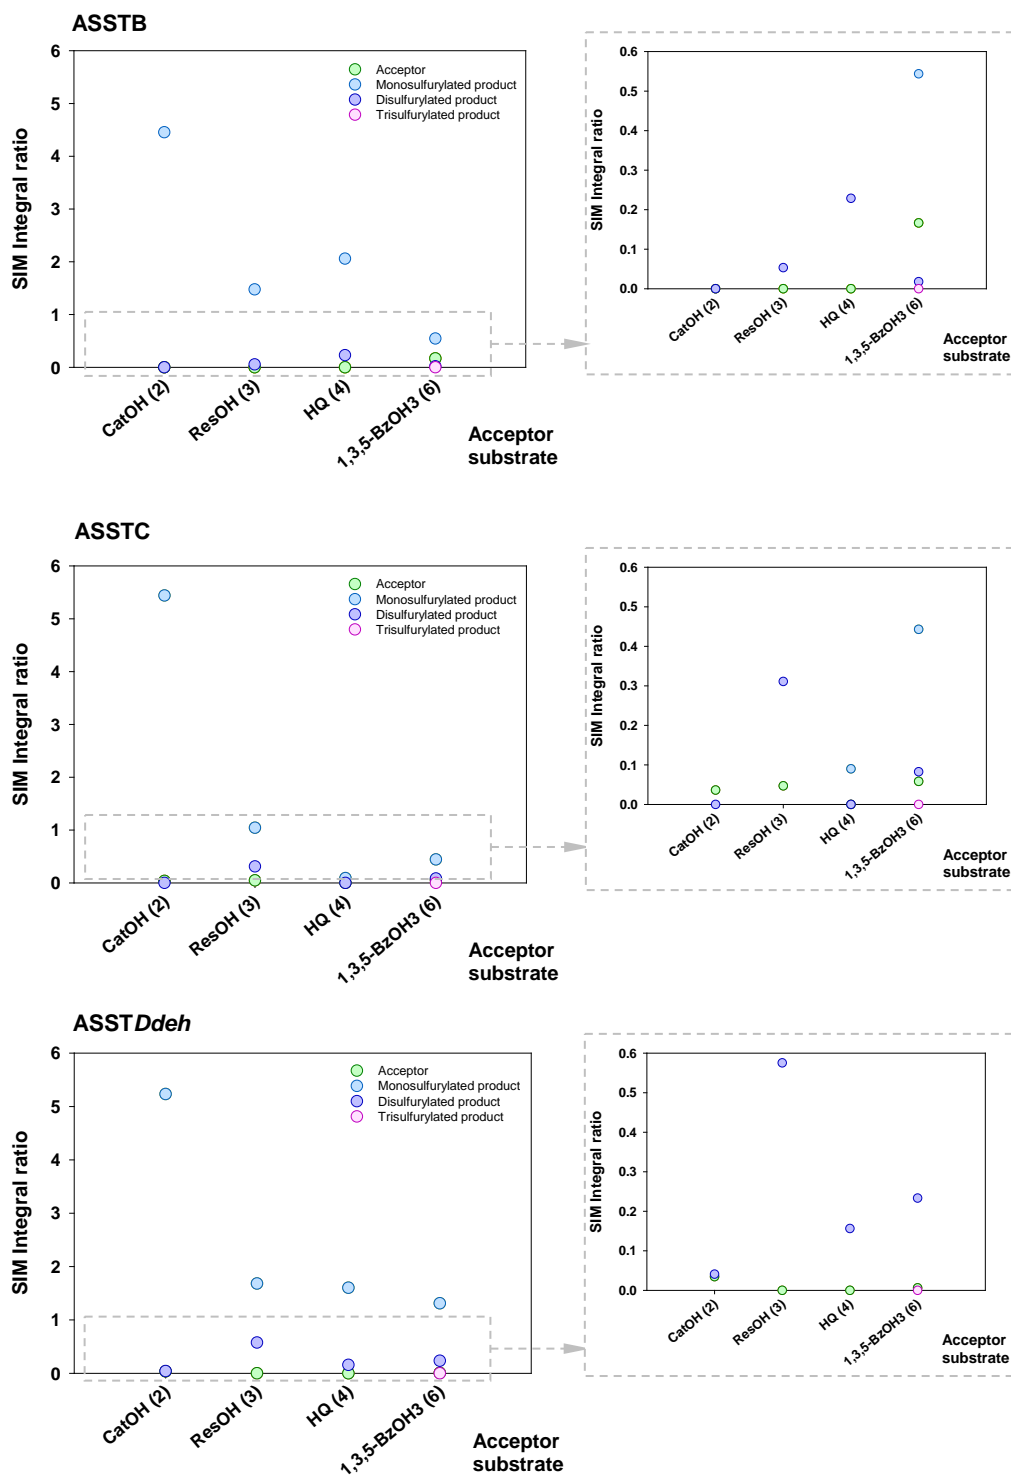

**Fig. S11** Polysulfation screening of di- and trihydroxy aromatic compounds catalyzed by ASSTB, ASSTC and ASSTDdeh during a long period of time. Colored dots show the SIM integral ratios (target/buffer) of the substrate and the possible products in the biotransformations. Reactions were carried out in buffer PIPES 20 mM, pH 8.0; acceptor (2, 3, 4, or 6) 10.0 mM; *p*NPS 30.0 mM; and purified ASST. Reactions were shaken at 650 rpm during 16 h.

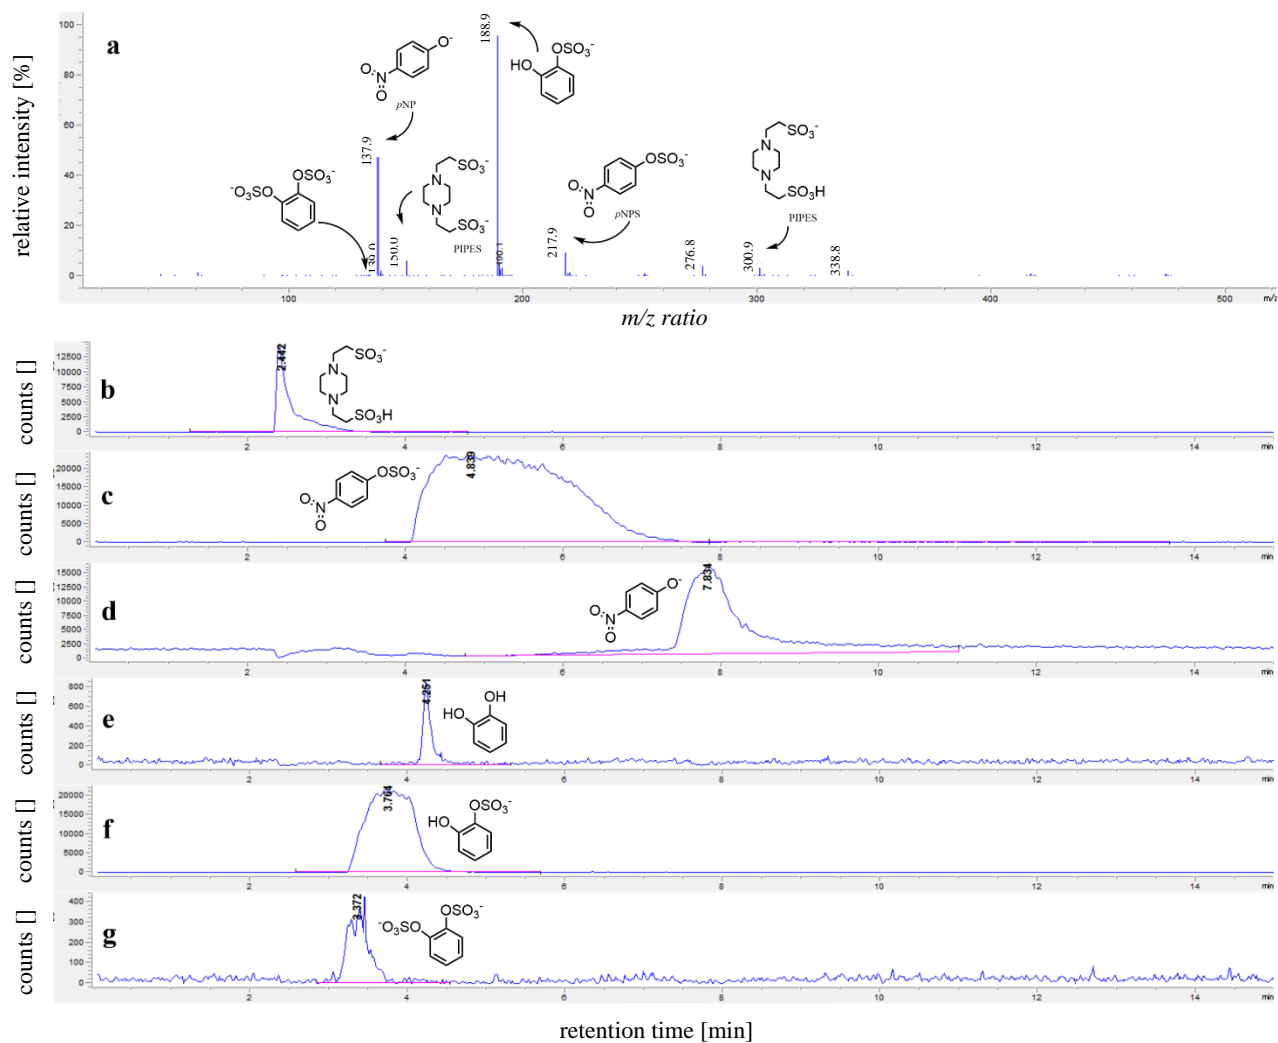

**Fig. S12** (a) Mass spectrum obtained in 16 h disulfation reactions catalyzed by *ASSTDdeh* with catechol (2) as acceptor substrate, identifying important observed species. (b-g) Extracted ion chromatograms showing the elution peaks of different species, i.e., (b) PIPES ( $m/z$  301), (c) pNPS ( $m/z$  218), (d) pNP ( $m/z$  138), (e) catechol (2,  $m/z$  109), (f) catechol monosulfate ( $m/z$  189) and (g) catechol disulfate ( $m/z$  134).

## Plasmid sequences

ASSTA *D. hafniense* as cloned in pET26b *in silico*

**Name:** pET26b-PelB- ASSTA-His

### Restriction Enzymes

5': *SacI*

3': *Sall*

**5' Flanking:** A

**3' Flanking:** None

### Gene sequence ordered

```
ATGAATCCGATCAAAAAGTGAACAGATTCCCCATATTATCCATAGACAAAAGGATTTGGAAGAAGCTTTTCTGGCTG
AATTCTCAGCGGGTCACTATAACGCTGGAGAATCCGCTGGTTAAGCTCAACCCTTATGATATTTGCCCTTAACGGCC
ATGGTCTTATTTGAAACACCCGTAGCCACCGAGGCAACCATAATCGTTCGTGGCAAAGAGCACCCCGGAGATATCC
GGCATAACCTTCCCCGCCGATAAAAAACATATTCTGCCGGTTTATGGTCTCTATGCCGATTACGAAAATAAGATCGA
AATCGTCTCGGCAATGGGCAGAAGAACCATAACCCTTAAGACCGAGCCCTTCATCCCGATGTCGCGTGGCC
ACCTCGATCAAGACCACCCCGAATACATGGGCAACAACCTGATGTTTCTGACGGCAGCGATGAAGGCTATGCCTG
TAGGCTATGACTATGCCGGAGAAGTTCGCTGGTATGCCACAAGGAACCTTGCCTTTGATCTCAAGCGTATGCCCAA
TGGACATATTCTCATTGGTACGGAGCGTTTGGTCAAATTGCCCTATTTACCACAGGTCTATATGAAATGGCCTTTA
GTGGGAAGATATTCAAAGAATACCGTCTATCCGGCGGATACCACCATGATCAATTTGTCATGGAAGATGGCAACAT
TCTGGTGCTTACTTTTACTACTCAGGTACGGTTGAAGATATGTGCGTGCTCCTGGATGCCATAACGGGAGAAA
TTCTCAAGTCATGGGACTATAAAAAGGGTCTGCCCCAGGATGTAGCCGGTTCGGGAAGCCAGGATGCCACGATTG
GTTTCATAATAACGCCGTTTGGTACGATAAGAAGACACACAGCTTAAGCTTCTCCGGTTCGTACCAGGATGTGGTG
ATCAACCTTGATTATGATACAGGTGAGTTAAACTGGATCATTGGGGATCCTGAAGGATGGCCCCAGGACATGGTGG
ACAAATATTTCTTTACCCCGTTGGGGAAGGGGAATTTGACTGGCAGTATGAGCAGCATGCTTGCGTCTTTTACCT
GATGGGGATATCATGCTCTTTGATAACGGCCACTTCAGAGCGAAGAAAAAGAGAATTACTTGCCCAACGGCCGG
AATTTACGCCGTGGTGTGAGGTACCGTATTGATACCGAAAAGATGACCATAGAACAAGTATGGCAATATGGAAAA
GAGCGGGGCGCGGAGTCTTCTCTCCCTACATTTGCAATGTGGAGTATTACAATGAAGGCCATTACCTGGTTCACTC
CGGCGGCATCGGCTATGAAAACGGTGAACCTGCGAAGGTATGGCAGTTATGAAAGTCTGCAACCGGAGTTTAA
GGATAGTGTGTTTACCTTCAATTCCATTACCTGTGAGCTTAAAGATGACGTGCTGATGTATGAGTTGCAAGTACCGG
CCAATTGTTACCGGGCTGAAAAATTGCCCTCTACTATGCCACGAAACGGCTGAATTAGGTGCGGGCGAAATACT
GGGCAATTTAATTGAGACCCAGGAGACAAAGATGAAGATCAAGGCTGTGGAGACAGGTGAAAGAGTGCCGGATCA
TTATGAGGCATCCATCACAGAAGAAGAGGATCGGGTCTCTTTAACGCCATCTTCGAGGCCGGGAAATGGCTCAG
CTGCTTTTGGTGGACGGAGACGGCGGGGTAAAGAGATATCCTGTCAATACTGTGCCTCAGGCCTTCCAAGCCATGT
GTGTAGGGACGTTCCAGAAAGCTGACCCCGCAATATCGATGTTTATATCAACAAGACCGGATTATCCGAAAAATA
TCAAGTAAAGCTCATCGCAGAAGAAAACTCTATGAGACCGGAGTGTCTATTACAGCT
```

ASSTB *D. hafniense* as cloned in pET28a in silico

**Name:** pET28a-ASSTB-His

**Restriction Enzymes**

5': *Nco*I

3': *Sac*I

**5' Flanking:** CA

**3' Flanking:** AA

**Gene sequence ordered (optimized for *E. coli*)**

CTGCGTACCTATCTGAATACCGAAAAACATCTGATTACCCCTGCAGGCAGAAAGTGAAGAACGTTTTCTGGCCGAAC  
TGCGTGCCGGCAATTATACCGCAGAAAGTCCGCTGGTTGTTAAAAATCCGTATATTATTAACCCGCTGGCCGCCGTT  
ATTTGTTTTAATACCGATGAAGAAACCACCGCCGAAATTACCGTTAAAGGCAAAGCCATTGAAGGCGATCTGAGTC  
ATACCTTTGCCGCCGCCAAAGAACATGTTCTGCCGGTTTATGGCCTGTATGATGATTATGTTAATACCGTTGTGATC  
AAACTGAGCAATGGCAAACCAGCGAAGTGAATAATTGAAGTGAAGAAGTGAATGTTAACAAGCCCTGTATTGC  
CGTACCACCCCGGAATATTTTGGTAAAGATTTTATGCTGATCAGCACCACCACCCCGCTGATTGAAAGCGCCCGCA  
CCGCCGGCTTTGATTATGCAGGCGATCTGCGCTGGTGTATTACCAATCTGCAGAGTTGGGATATTAAGAAACTGGA  
AAATGGCCGCTGCTGTATAACCAGCCATCGTACCGTGCAGAAACCGTATTATAATGTTGGCGTTATGGAAATGGAT  
TTTTGTGGCAAATCTATAAGGAATACCGTCTGCCGGGCGGCTATCATCATGATGCCGTGGAAGTGGAAATGGTA  
ATATTCTGGCAGCCAGTGATAATGATTTTAAATGATAGTGTGAGGACTTCGTTGTTGAAATTGAACGTGCCACCGGT  
GCAGTTATTAAGAGCTGGGATCTGCAGAAAATTTCTGCCGCGCGGTGAGGGCAAAGCAGGCGATTGGAATCATCAT  
GATTGGTTTCATAATAACGCAGTGTGGTATGATAAACCGACCAATAGCATTACCATGAGCGGTCGCCATATGGATG  
CCGTGATTAATTTTGATTATGATAGCGGCGCCCTGAATTGGATTCTGGGCGATCCGGAAGGTTGGAGCGAAGAATG  
GCAGAAATATTTCTTTAAAAACGTGACCAAGGGTGACTTTGATTGGCAGTATGAACAGCATGCCGCCCGTATTCTG  
CCGAATGGTGACGTTTTTTCTGTTTGATAATGGCACCTATCGTAGTAAAAATGAAGCAACCCGCGTTGATCCGGAAC  
AGAATTTTAGTCGTGGTGTATCTATCGTATTGATACCGATAAAAATGGAAATCGAACAGGTGTGGCAGTATGGCAA  
AGAACGCGGCGCCGAATTTTATAGTCCGTATATTTGTAATGTGGACTATTATGGTGAGGGTCATTATATGGTGCATA  
GCGGCGGTATTGCAACCTATCGCGCAAACATACCGATGGCCTGGGTGCAATGCTGCTGAATAAGTATAAAGATGA  
ACATATCCACCTGACCCTGGAAAGCATTACCGTTGAAGTTCAGAATGATCAGCTGAAATATGAACTGAAAGTGCAG  
GGCGGTAATTATTATCGCGCACGCCGCGTTAGTCCGTATGATGAAAAACCAATCTGGTGTGGGTAAAGGTGAAC  
TGCTGGGTGGTTTTTGGTGTACCACCGGAATTCATGAAAGTTAATTTTAAAGACGCCGAAACCGAACTGAGTGA  
ACATAATCTGAATGTTATCCTGGAAGAAGATCGCCTGGCAATTCGCGCCAGCTTTTCGTGAAGGCAGCCAGGTTTTT  
CTGGAAGTGAAGGCGCCGAACAGAGCAAATTTTATAATATTCCGACCGAAGTTCACGATGTGACCGCCGCTGCG  
TTAGTTTTGAAGAACAGAATGATAATGACTTCCAGTTTTATGTTAGCCGGAAGGCCTGAGTGGTGAATTTGGTATC  
TATCTGAATATTGATAGCAAGCGCTATGATACCCATCTGAGTGTGAAACTG

ASST *D. dehalogenans* as cloned in pET28a in silico

**Name:** pET28a-ASSTD<sub>deh</sub>-His

**Restriction Enzymes**

5': *Nco*I

3': *Sal*I

**5' Flanking:** GA

**3' Flanking:** -

**Gene sequence ordered** (to be optimized for *E. coli*)

ATGATGAATCCGATTA AAAAGCGAACAGATTCCGCATATTATTCATCGTCAGAAAGATTTTGAAGAAGCATTCTGG  
CAGAATTTAGCGCAGGTCATTATACCCTGGCAAATCCGCTGGTTGAACTGAATCCGTATGAAATTTGTCCGCTGACC  
GCAATGATTCTGTTTAAAACCCCGTTAGCACCGAAGCAACCATTATTGTTCGTGGTAAAGAACATCCGGGTGATA  
TTCGTCATACCTTTCCGGCAAATAAAAAACATATTCTGCCGATTTATGGTCTGTATGCAGATTATGAAAATAAAGTT  
GAAATTGTTCTGGCAAATGGTCAGCGTAATACCGTTACCATTAAAACCGGTCCGCTGCATCCGGATGTTCCGGTTGC  
AACCAGCATTA AAAACCACCAGCGAATATATGGGTAATAATCTGATGTTTCTGACCGCAGCAATGAAAGCAATGCCG  
GTTGGTTATGATTATGCAGGTGAAGTTCGTTGGTATGCAACCCGTAATTTTGCATTTGATCTGAAAACGTATTCCGAA  
TGGTCATATTCTGATTGGTACCGAACGTCTGGTTAAAATGCCGATTTTACCACCGGTCTGTATGAAATGGCATTTA  
GCGGTAAAATTTTTAAAGAATATCGTCTGCCGAGCGGTTATCATCATGATCAGTTTGTATGGAAGATGGTAATATT  
CTGGTTCTGACCTTTGATTTTTATAGCGGTACCGTTGAAGATATGTGTGTTCTGCTGGATGCAGAAAACCGGTGAAAT  
TCTGAAAAGCTGGGATTATAAAAAAGTTCTGCCGCAGGATGTTGCAGGTAGCGGTAGCCAGGATGCACATGATTGG  
TTTCATAATAATGCAGTTTGGTATGATCGTAAAACCAATAGCCTGAGCCTGAGCGGTCTGCATCAGGATGCAGTTA  
TTAATATTGATTATGAAACCGGTGAACTGAATTGGATTATTGGTGTATCCGGAAGGTTGGCCGCAGGATATGGTTGA  
TCAGTATTTTTTTACCCCGGTTGGTGAAGGTGAATTTGATTGGCAGTATGAACAGCATGCATGTGTTGTTCTGCCGG  
ATGGTGATATTATGCTGTTTGATAATGGTCATTTTCGTGCAAAAAATAAAGAAAATTATCTGCCGAATAGCCAGAA  
TTTTAGCCGTGGTGTTCGTTATCGTATTGATACCGAAAAAATGACCATTGAACAGGTTTGGCAGTATGGTAAAGAA  
CGTGGTGCAGAATTTTTTAGCCCGTATATTTGTAATGTTGAATATTATGATGAAGGTCATTATCTGGTTCATAGCGG  
TGGTATTGGTTATGAAAATGGTGAACCTGTGAAGGTATGGCAGTTATGAAAGTTCTGCAGCCGGAATTTAAAGAT  
AATGTTTATACCTTTAATAGCATTACCTGTGAACTGAAAGATGATGTTCTGATGTATGAACTGCAGGTTCCGGCAA  
TTGTTATCGTGCAGAAAAACTGCCGCTGTATTATGCATATGAAACCGCAGAACTGGGTGAAGGTA AAAATTCTGGGT  
AATCTGGTTGAAACCCAGGAAACCAAAATGAAAATTAAGCAGTTGAAACCGGTGAACGTGTTCCGGATCATTAT  
GAAGCAAGCATTACCGAAGAAGAAGATCGTATTCTGCTGAATGCAATTTTTGATGCAGGTGAACTGGCACAGCTGC  
TGCTGGTTGATGGTGTATGGTGGTGTAAACGTTATCCGATTAGCACCGTTCCGCAGGCATTT CAGGCAATGTGTGTT  
GGTACCTTTCAGAAAGCAGATCCGCGTAATATTGATGTTTATTAATAAAAACCGGTCTGAGCGGTAAATATCAGG  
TTAAACTGATTGCAGAAGAAAAACTGTATGAAACCGGTGTTAGCATTACCGCA

ASST *D. formicoaceticum* as cloned in pET28a in silico

**Name:** pET28a-ASSTDfor-His

**Restriction Enzymes**

5': *NcoI*

3': *SalI*

**5' Flanking:** GA

**3' Flanking:** -

**Gene sequence ordered** (to be optimized for *E. coli*)

ATGAACGCAATTAATCTGAACAGGTTCCCTCATATTATTCATCAACAGGAAAAGCTGGAAAAAGCATTCCCTCGCTG  
AATTTGCTGCAGGTGGTTACTTTTATATAATCCTCTGGTCAAAATCAATCCGTATGGGATTTGTCCTTTAACTGCG  
ATGGTGTATTTCGAAACACCGGTGCGCCACAGAGGCCACAGTGGTAGTGCGGGGCAAAGAACATCTGGGTGACATA  
CGTCACACATTCCCAGCTGGAAAAAACACATACTGCCAATCTATGGTCTTTACGCCGACTATGAAAAATAAGATCG  
AATTGATAATGGCTAATGGCCAGAAAAATACCATTAATAATCCAAACTGAACCGCTTCATACAGATGTACCCGTGGC  
TACTTCTATAAAGACCACACCAGAATATATGGGTAACAATTTGATGTTTTGACCGCCGCGATGCGCTCCATGCCTG  
TGGGTTATGATTACGCAGGGGATATTAGATGGTATGCAACCAAAAATTTGCGCTTTGACTTGAAACGCCTGCCAA  
TGGCCACATTCTGGTGGGAACCGAACGTTTAGTCAAAAATGCCCTATTTTACAACCTGGTCTTTACGAAATGGCGTTCT  
CTGGGAAAATTTTTAAAGAATATGTTCTGCCAAGCGGCTATCATCACGACCAGTTCCTCGATGGAAGACGGTAATAT  
ACTGGTGCTCACCTTTGACTTTTACAGCGGGACAGTTGAGGATATGTGTGTGTTGCTTGACGCGAAAACTGGAGAA  
GTGTTAAAGTCTTGGGACTATAAAAAAGTCCTGCCACAAGATGTGGCGGGTAGTGGTTCTCAGGATGAACATGATT  
GGTTTCACAACAACGCAGTATGGTATGATAAGAAAATAACTACTGTCTCTTTCAGGGAGACACCAGGATGCAGT  
GATAAATATCGACTATGAGACTGGCGAATTAATTGGATAAATTGGTGATCCGGAGGGTTGGCCTAAAGAAATGGTT  
GATAAATACTTCTTTACCCCGGTTGGAGATGGTGACTTCGATTGGCAATATGAGCAGCACGCTTGCCTGGTACTGCC  
GGATGGTGACATTATGCTGTTTGATAATGGGCATTTCCGTGCAAAAAACAAGGAGAACTACTGGCCAAATTCAAA  
AACTTTAGCCGCGGAGTACGATATCGTATTGATACCGAGAAAATGACCATAAAACAGGTCTGGCAATACGGCAAG  
GAACGTGGCGCAGAGTTCTTCTCGCCATATATTTGCAACGTGGAGTATTACAACGAAGGGCATTATCTGGTTTCATTC  
CGGAGGAATTGGTTATGAAAACGGGAAGCCTTGGCAGGGCATGGCGGTTATGAAAACGATGCAGCCTGAATTTAA  
GGATAACGTGTATACTTTTAAACAGCATTACATGTGAACTGAAAGATGACGTTCTGATGTATGAATTGCAGGTGCC  
GCCAATTGCTATCGTGCCGAAAACTGCCACTTTACTACGCCAACGAAACGGCCGAACTGGGCGCCGGTGAAATTC  
TAGGAACTTGATTAAGACTGAAGAGACTAAAATGAAAATCAAAGCTGAAGAACTGGCGCCCTCGTCCAGATC  
ATTTCCAGGCCAGCATTACGGAAGAAGAGGATCGATTTCTTTTTAATGCCATTTTCGACGCGAGGAGAGATGGCCCA  
GTTGCTGTTAGTTAACGAAGCTGGAGAAATTAAGATATCCAATTAACACTGTGCCGCAAGCGTTCCAGGCAATG  
TGCGTCGGCACTTTTCAGAAAGCAGACCCTCGTAATATTGATACGTTTCATAAATAAAATTTGGTCTGTCTGGTAACTA  
TCAGGTCAAACCTGGTTGCTGAAGAAAAGGTATACGAGACAGGGTTACAATCAAGGCA

ASSTC *D. hafniense* as cloned in pET28a in silico

**Name:** pET28a-ASSTDhaf03-His

**Restriction Enzymes**

5': *NcoI*

3': *SalI*

**5' Flanking:** GA

**3' Flanking:** -

**Gene sequence** (to be optimize for *E. coli*)

ATGGTGGATTATGAATATTGTCCCATATTATCACGAAACAGAATGAGTTAGAAAAAGCATTATGGAGAAATTCG  
AGGCTGGGAATTATTCGCTGGAAAATCCATTAGTGATCCTGAATCCGTATGGCGTGGCACCGCTAACAGCAATGAT  
CCTCTTTAATACCCCTATCGCTTGCGAAGCGAAAATAATTGTGAAAGGAAAGGAACATCCCCGGCGATATTCAACAT  
ACTTTCCCAGCAGCGACGCGACATATACTGCCGGTCTATGGACTGTATGGAGGTTATAAAAAACTATTAAGATTA  
TCCTTTCCACGAGTTCGTCAAATACTATCACGATTCAGACCGAACCATTGCCGAAGAGTGTGCCATTCCCTCGAGC  
ATTAAGACTACCTCGGAATATATGGGAAACAACCTGATGTTCTCTCTCCGTCAATGGCTAGTCTTACTGTGGGCTA  
TGATTATGCCGGGGATGTACGTTGGTATTGCTCATTGAACGTCTGCTTCGATCTCAAAACGTATGCCGAACGGCCACT  
TGCTGATTGGCACCGGACGCCTTGTGAAAGTACCGTACTATAACAAGTGGCTTATATGAAATGGCGTTTAGCGGCAA  
AATATTCAAAGAATTTATCCTACCGGGTGGCTACCATCATGATCAGTTCGTGATGGAAGATGGCAACCTGCTGGTT  
CTTACTCAAGACTTCTATGCCGACACCGTAGAAGATGTATGTGTACTGATCGATCCTCACTCTGGTGACATTCTGAA  
GAAATGGGATTTTAAAAATATCCTTCCCCAAGATGTGGCAGGCTCAGGAACACAAACAGCGCACGATTGGTTTCAC  
AACAATGCAGTATGGTATGATAACAGAACTAACTCTGACTTTGTCTGGACGACACCAGGATGTGATCATTAAACA  
TTGATTACGAAACTGGGGACTCAACTGGATGATTGGGGATCCTGAAGGATGGCCGCAGGAACTAGTGGATAAAT  
ACTTTTTTACCCCTGCCGGCGACGGCGAATTCGATTGGCAGTATGAACAGCACGGTTGCGTTGTGCTGCCTGACGG  
AGACATCATGGTATTCGATAATGGTCATTATAGGTCTAAAAACAAAGAGAATTATCGCTTGAATAAAGACAATTTT  
TCTCGCGGTGTGCGCTACCGCATAGATACGGAGCGTATGACCATTACAGCAGATTTGGCAGTATGGGAAGGAGCGCG  
GCGCGGATTTTTTCTCTCCATTCAATTTGCAATGTAGAATATTATGATGAGGGACATTATATGGTACATTCTGGAGGT  
ATAGGCTACGAAAATGGGAAACCCTGTGAAGGCTTGGCAGTGGGGAAAAGCAAAAATCCGAAATTCAAAGACAAT  
GTTTATACACTCAATTCGATCACGTGCGAACTGGTAAATGATGAATTGGTGTATGAACTGCAAGTTCGGCAAATTT  
TTATCGCGCCGAGAAATTACCAATTTATTACGCAAACGAGGTTCGCGGAGCTGTGTGAAGGGCAGCGGCTCGGACA  
GTTTCGTGGAAACACAAACCACACGTATGAAGATCAAGGCACTCGAGACGAAAGAGCCGATCCAGAACATTATCA  
AGCTAAGATTGTGGAAGAAGAGGATAGATTCTGCCTGAACGCAATTTACGAGAGTGGGGAGACAGCTCAACTGCT  
GCTGGTCTCAGAATCAGATGAAATTTTGTGATATCCAATTAATACAGTGGCTCAGGCGTATGGTGCCATGTGTGTG  
GGCACCTTCCAAAAATCTGATCCTCGGAATGTAGACACTTTCGTGACCAAGACAGGGTTGTCCGGAAAATACCAAG  
TCAAACCTGGTCGCGGAGGACAAGATATATGAAACCGGTGTGACAATTTCCGGCT

ASST *D. orientis* as cloned in pET28a in silico

**Name:** pET28a-ASSTDori-His

**Restriction Enzymes**

5': *NcoI*

3': *SalI*

**5' Flanking:** GA

**3' Flanking:** -

**Gene sequence ordered** (to be optimize for *E. coli*)

ATGTCGGTAAAGTTTAAAAGTTTTGATCACATTATCACCGAACAGTACCAGGCAGAGCAGGCATTCTTAACAGAAT  
ATCAAAAAGGTGAATACAGCTTAAATAACCCGTATGTGAAACTTAACCCTTATATTATTGCCCCATTAACCGCACTT  
GTCATGTTCAAAACTGCGCAGCCTACCACTGTTACCATCACCGTCAAAGGAAAAGACAAGAATGGAGATATATGCT  
TTAATTTTCCAACGGCCATAGAACACCTGATCCCAGTTTATGGGTTGTATGCCAACTATGCCAATAAAGTAGAACTT  
GCGTTGGGTGATGGGAAAACAAACGTTATACCATAACAGACGGAAGCTGCCCTGAAATTGTGAAACTTCCAACCC  
AGATTAACACGACAGCGGATTATTTGAGGACAATATTATGTTTCGTTAGTCCAACAAGTACTGCCGCTACCGCGGG  
ATATGACTATAATGGGGATGTGCGCTGGTATGGTTCCCTGAATTTTGCCTTTGATATCAAGAGAGCAAAGAATGGA  
CGTCTTCTTTTAGGAACACACCGCCTTGTACGCCTCCTTACCACACAACCGGCCTTTATGAAATGGGCATGATCGG  
TAAAATTTATAAGGAGTATCGGTTACCAAGTGGTTACCACCATGACCAGTTTGAGATGGAAGATGGTAACTTATTA  
ATCCTGTCCCAAGATTTACCGCGGGGTACAGTTGAAGATATGTGTGTATTAGTAGATAGAAAAGACGGGTCAGATCA  
TAAAGAGTTGGGATTACCAAAAAGTGCTTCCGACGAACGCCGGGGTCTGGGTCGCAGGACTCCCACGACTGGTT  
TCACAATAATGCCGTTTGGTACGATAAAAAGACCAACAGTCTCACTTTGTCTGGCAGACACCAGGACATCATAATT  
AATCTGGATTTTGGAGACCGGTGCACTGAACTGGATAATAGGGGATCCCGAAGGGTGGCCAAAAGAATTGGTCGAT  
AACTATTTTTTTAAGCCGGTAGGTAAAGGTGAATTCGACTGGCAGTACGAACAACATGCATGTGTGGTTTGCCCGA  
ATGGTGACATAATGGCCTTTGATAATGGGCATTGGCGCTCTAAAATTAAGAGAATTACGTCAGTACTGCTAACGATAA  
TTTTTCGCGAGGGGTTTCGTTATCGTATCGATACCAAGAAGATGGAGATCGAACAGGTGTGGCAATATGGGAAAGAA  
AGAGGCGCGGAATTTTTCAGCACGTACATTTGTAATGTGGAGTACTACGATGAGGGGCACTACTTAATCCATTCTG  
GCGGCATCGGTTCCATTGATGGCGAAGCCCTTAATAAACCCCGGTGCAGTTTAGGGGAGAAGATGAAAAAAGG  
TGGTATTTAACTCAATTACCGTAGAACTGAAAAGATGACGTGATGATGTATGAAATGCAGCTGCCTGCTAACTATTA  
TCGTGCCGAAAAACTGAAGTTATACGCCGCGGAAGATGTTCTGACGCTGGGTAAAGGGGAACTTCTGGGGACATTA  
GGAGTGACCGAAGAGTTCACCACGATACCCCGGCAGAGAAGGCGGGATGGTTCCGGAAAAATACAATGTAAAA  
CTGGGCTTAGAAGAAGATCGGCTTATTTTTAAGGCCACATTTGAAAAAGGTCAGATGGTGCTATTACAGCTCGAAG  
GTGAAACAACGCATTCATATTTGTGCCTACTACCAAGCGACCATTTTTGGCCATGTGCGTCGGCACGTTTCAGGAA  
TCAGATGATCGTGCTGTAGAATTCCTCGTTCGAGAAGGACTGGCTGGAGGTTTTTCGGGTTTCTCTAATTGTGGA  
CGCATATAAGTATGAAACCGGGTCACTATAAACTA



ASST *H. effluvii* as cloned in pET28a in silico

**Name:** pET28a-ASSTHeff-His

**Restriction Enzymes**

5': *NcoI*

3': *SalI*

**5' Flanking:** GA

**3' Flanking:** -

**Gene sequence ordered** (to be optimize for *E. coli*)

ATGATCCGTTATGAGAAAAAGAATTCACCTCATTACACAGCAGGCGGAAAGCAGAACAGAAGTTTTTGGAAACATTTG  
AAGCTGGGGCCTACACCGCGAGTAGTCCGCTGGTTGTGCGTAATCCTTATCTGATTAGCCCGCTTCCGCAATGATC  
CTGTTTAAAACAGCCGTTAAACAAGAGGTAACACTGACGGTGAAAAGGAAAGAGCCGGAAGGTGATATCTCTCAT  
ACTTCCCGGCAGACACAATTCATATTTTACCAGTGTATGGTCTATACGCAGACTGTGAAAACACAGTTGAACCTAT  
CTTATCTGGGGGGGAACGAGAGACAGTCATGATCAAAACGGAACCGCTGCCTCCTGAGGTCCCTGTTCTACTTTT  
TGTAAGGTTCTGGCGCGCATATGGGGGACAATGTTATTTTCCCTCACGCAGACATCCAAAGCCGACGCGTTGGCCT  
GCGATTACCGGGGCGATGTTAGATGGTATCTGACAGTTAATGTGTGCTTCGATATGAAACGCTGGCAAACGGTCA  
CCTTTTGGTGGGAACCGATCGCTTGATTAAGCTGCCGTAACGTAAGCGGTGTGTATGAAATGGGTGTTTCATGGA  
AAGATTTACCGCAATATCGTCTGCCTGGAGGTTACCACCATGATACGTTTGAAATGGAAGATGGTAATATTCTGA  
TGTTGAGCCAAATACCGGACCGGGATACGGTGGAAAGACGTCCTGGTCCTCGTAAATCGCCAGACTGGCGCGATTGT  
TCGAACATGGGATTACCGCGAAATCTGCCCTACGACTGTCAGACCACATGGTCAGGGTCAGCGAGCGCTCACGAT  
TGTTTCATAATAATGCCGTTTGGTATGATAAGAAAACGGATTTCGATTACACTCTCTGGCCGTCATCAGGATGCTGT  
CATCAATATCGATTTTAAAACAGGTGCCCTCAATTGGATTCTTGGAGACCCAGAAGGGTGGCCCGAAGAATATGTA  
GAAAAATATTTTTTCCGTCCGATATCAGAGCCGTTTCGAGTGGTCCTATGAACAGCATGGAGTGGTCGTATGTCCGG  
ATGGAGACATCATGATGTTTCGATAATGGACACTACCGTTCTAAGCTGAAGGCACATTATTCAAAGCTAAAGATTC  
ATATAGCCGTGGTGTTCGGTATCATATCGATCGCGAAGCAAGGACTATTGAGCAGGTGTGGCAATATGGGAAAGA  
GAGAGGCGCGGATTTCTTTAGCCCGTACATTTGCAATGTTGAATACTATGATGAGGGTTCGGTACATGGTTCATAGT  
GGCGGAATTGCGTACAAAGATGGTGAACCATTGGAAGGCTTAGGAAGCATGGATGGAACCGGTGAGGGGTGCACG  
CTGAACGCCATAACATGCGAGCTGGTAAATGATGAGGTAGTGTACGAGTTGCACGTTCCCTCCAACGTTTTTCAGGG  
CCGAAAAATTGCCCATGTATTACGCAGGTGAAACCGCGGAATTAGGAGCAGGTAAAACCCTAGGCTCCATGTCAC  
GTACGGGAGAATTCGAGACCGAAATCCCGCAGTTTGACAGGAGATCTGATACCGGAGCACTATGAAGCCTCTGT  
AACGGAGGAAGAGGATCGTATATTGTTTAAACGCGACCTTCGAAAAAGGTGAGCTCGCAATGCTTTTTGCTGGAAGAA  
GAGGACGGCAAAGCGCATCGTTATTATATAAAACTTCTGCCGCGAAAAATTTGAGGCGATGTGCGTTGGCACTT  
TCCTGAAGAATGATCCACGCAACGTAGATGTTTATGTCAATAAATGTGGGATGAGTAAGAACGTCAAAGTGAGGGT  
TCTGTTAGAAGATAAAAATCTACGAAACGGGTGTAGAGATCCGTATGGAA
